RESEARCH ARTICLE

# Protein Kinase C-Independent Inhibition of Organic Cation Transporter 1 Activity by the Bisindolylmaleimide Ro 31-8220

Abdullah Mayati<sup>1</sup>, Arnaud Bruyere<sup>1</sup>, Amélie Moreau<sup>2</sup>, Elodie Jouan<sup>1</sup>, Claire Denizot<sup>2</sup>, Yannick Parmentier<sup>2</sup>, Olivier Fardel<sup>1,3\*</sup>

**1** Institut de Recherches en Santé, Environnement et Travail (IRSET), UMR INSERM U1085, Faculté de Pharmacie, 2 Avenue du Pr Léon Bernard, 35043, Rennes, France, **2** Centre de Pharmacocinétique, Technologie Servier, 25–27 rue Eugène Vignat, 45000, Orléans, France, **3** Pôle Biologie, Centre Hospitalier Universitaire, 2 rue Henri Le Guilloux, 35033, Rennes, France

\* [olivier.fardel@univ-rennes1.fr](mailto:olivier.fardel@univ-rennes1.fr)

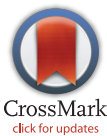

## Abstract

Ro 31–8220 is a potent protein kinase C (PKC) inhibitor belonging to the chemical class of bisindolylmaleimides (BIMs). Various PKC-independent effects of Ro 31–8220 have however been demonstrated, including inhibition of the ATP-binding cassette drug transporter breast cancer resistance protein. In the present study, we reported that the BIM also blocks activity of the solute carrier organic cation transporter (OCT) 1, involved in uptake of marketed drugs in the liver, in a PKC-independent manner. Ro 31–8220, in contrast to other pan-PKC inhibitors such as staurosporine and chelerythrine, was thus shown to *cis*-inhibit uptake of the reference OCT1 substrate tetraethylammonium in OCT1-transfected HEK293 cells in a concentration-dependent manner ( $IC_{50} = 0.18 \mu M$ ) and without altering membrane expression of OCT1. This blockage of OCT1 was also observed in human hepatic HepaRG cells that constitutionally express OCT1. It likely occurred through a mixed mechanism of inhibition. Ro 31–8220 additionally *trans*-inhibited TEA uptake in OCT1-transfected HEK293 cells, which likely discards a transport of Ro 31–8220 by OCT1. Besides Ro 31–8220, 7 additional BIMs, including the PKC inhibitor LY 333531, inhibited OCT1 activity, whereas 4 other BIMs were without effect. *In silico* analysis of structure-activity relationships next revealed that various molecular descriptors, especially 3D-WHIM descriptors related to total size, correspond to key physico-chemical parameters for inhibition of OCT1 activity by BIMs. In addition to activity of OCT1, Ro 31–8220 inhibited those of other organic cation transporters such as multidrug and toxin extrusion protein (MATE) 1 and MATE2-K, whereas, by contrast, it stimulated that of OCT2. Taken together, these data extend the nature of cellular off-targets of the BIM Ro 31–8220 to OCT1 and other organic cation transporters, which has likely to be kept in mind when using Ro 31–8220 and other BIMs as PKC inhibitors in experimental or clinical studies.

## OPEN ACCESS

**Citation:** Mayati A, Bruyere A, Moreau A, Jouan E, Denizot C, Parmentier Y, et al. (2015) Protein Kinase C-Independent Inhibition of Organic Cation Transporter 1 Activity by the Bisindolylmaleimide Ro 31-8220. PLoS ONE 10(12): e0144667. doi:10.1371/journal.pone.0144667

**Editor:** Jeff M Sands, Emory University, UNITED STATES

**Received:** August 28, 2015

**Accepted:** November 20, 2015

**Published:** December 10, 2015

**Copyright:** © 2015 Mayati et al. This is an open access article distributed under the terms of the [Creative Commons Attribution License](https://creativecommons.org/licenses/by/4.0/), which permits unrestricted use, distribution, and reproduction in any medium, provided the original author and source are credited.

**Data Availability Statement:** All relevant data are within the paper and its Supporting Information files.

**Funding:** The authors have no support or funding to report.

**Competing Interests:** The authors have declared that no competing interests exist.

## Introduction

Ro 31–8220 is a potent pan-protein kinase C (PKC) inhibitor belonging to the chemical class of bisindolylmaleimides (BIMs), that contains 11 chemicals, numbered from BIM-I to BIM-XI, initially characterized for their putative interaction with PKCs [1]. Ro 31–8220 (also known as BIM-IX) inhibits PKC activity in various types of cells, including platelets and T lymphocytes [2], which is consistent with the fact that this lipophilic chemical is a cell-permeable compound, that most likely enters cells through passive diffusion as well-established for hydrophobic chemicals [3]. It notably blocks activity of classical  $\alpha$ ,  $\beta$ 1,  $\beta$ 2 and  $\gamma$  PKC isoforms [4] and is also thought to inhibit novel  $\delta$  and  $\theta$  and atypical  $\iota$  and  $\zeta$  PKC isoforms [5–10]. Ro 31–8220 has been consequently largely used in experimental studies for investigating PKC implications in various physiological, pathological or pharmacological cellular regulatory ways [11].

Several PKC-independent effects of Ro 31–8220 have however been reported, thus highlighting the lack of specificity of this PKC inhibitor [12]. Ro 31–8220 notably inhibits mitogen-activated protein kinase (MAPK) phosphatase-1 [13], RSK1, RSK2 and RSK3 isoforms of the p90 ribosomal S6 kinase [14], p70 ribosomal S6 kinase [15, 16], CDC2 histone H1 kinase [17] and glycogen synthase kinase-3 [18]. It also activates phosphoinositide phospholipase C and c-Jun N-terminal kinase, induces apoptosis in tumoral cells and blocks voltage-dependent sodium channels in a PKC-independent manner [19–22].

Inhibition of membrane ATP-binding cassette (ABC) drug transporters constitutes another type of off-target effects for Ro 31–8220 and related BIMs. Thus, GF 109203X (also known as BIM-I or Gö 6850) directly inhibits activity of the ABC transporters P-glycoprotein (*ABCB1*) and multidrug resistance-associated protein (MRP) 1 (*ABCC1*) [23, 24], thereby blocking efflux of anticancer drugs mediated by these pumps and consequently reversing drug resistance in tumoral cells. In the same way, activity of breast cancer resistance protein (BCRP/*ABCG2*), an ATP efflux pump also involved in anticancer drug resistance, is blocked by BIMs, including Ro 31–8220 [25]. In the present study, we report that the solute carrier (SLC) organic cation transporter (OCT) 1 (*SLC22A1*), known to play a major role in membrane transport of marketed drugs like metformine in the liver [26] and also recently identified as a high-capacity thiamine transporter that regulates hepatic steatosis [27], is markedly inhibited by Ro 31–8220 in a PKC-independent manner. In addition, Ro 31–8220 interacts with activities of other organic cation transporters, such as those of multidrug and toxin extrusion protein (MATE) 1 (*SLC47A1*) and MATE2-K (*SLC47A2*), which are inhibited, and that of OCT2 (*SLC22A2*), which is unexpectedly stimulated. Such data therefore extend the nature of the cellular off-targets of Ro 31–8220 to SLC transporters and suggest that caution is required when using Ro 31–8220 and related BIMs for studying potential protein kinase-mediated-regulation of drug transporter activity or expression, especially with respect to SLC transporters of organic cations.

## Materials and Methods

### Chemicals

BIMs I–XI and the PKC inhibitor LY 333531 (also known as ruboxistaurin), that contains a BIM core, were provided by Santa Cruz Biotechnology (Dallas, Texas) and Sigma-Aldrich (Saint-Quentin Fallavier, France). The chemical structures of these BIMs are shown in Fig 1. Verapamil, cyclosporin A, Gö 6983, amitriptyline, U0126, wortmannin, KN62, staurosporine, chelerythrine, tetra-ethylammonium (TEA), 4',6-diamidino-2-phenylindole (DAPI) and phorbol-12-myristate-13-acetate (PMA) were purchased by Sigma-Aldrich (Saint-Quentin

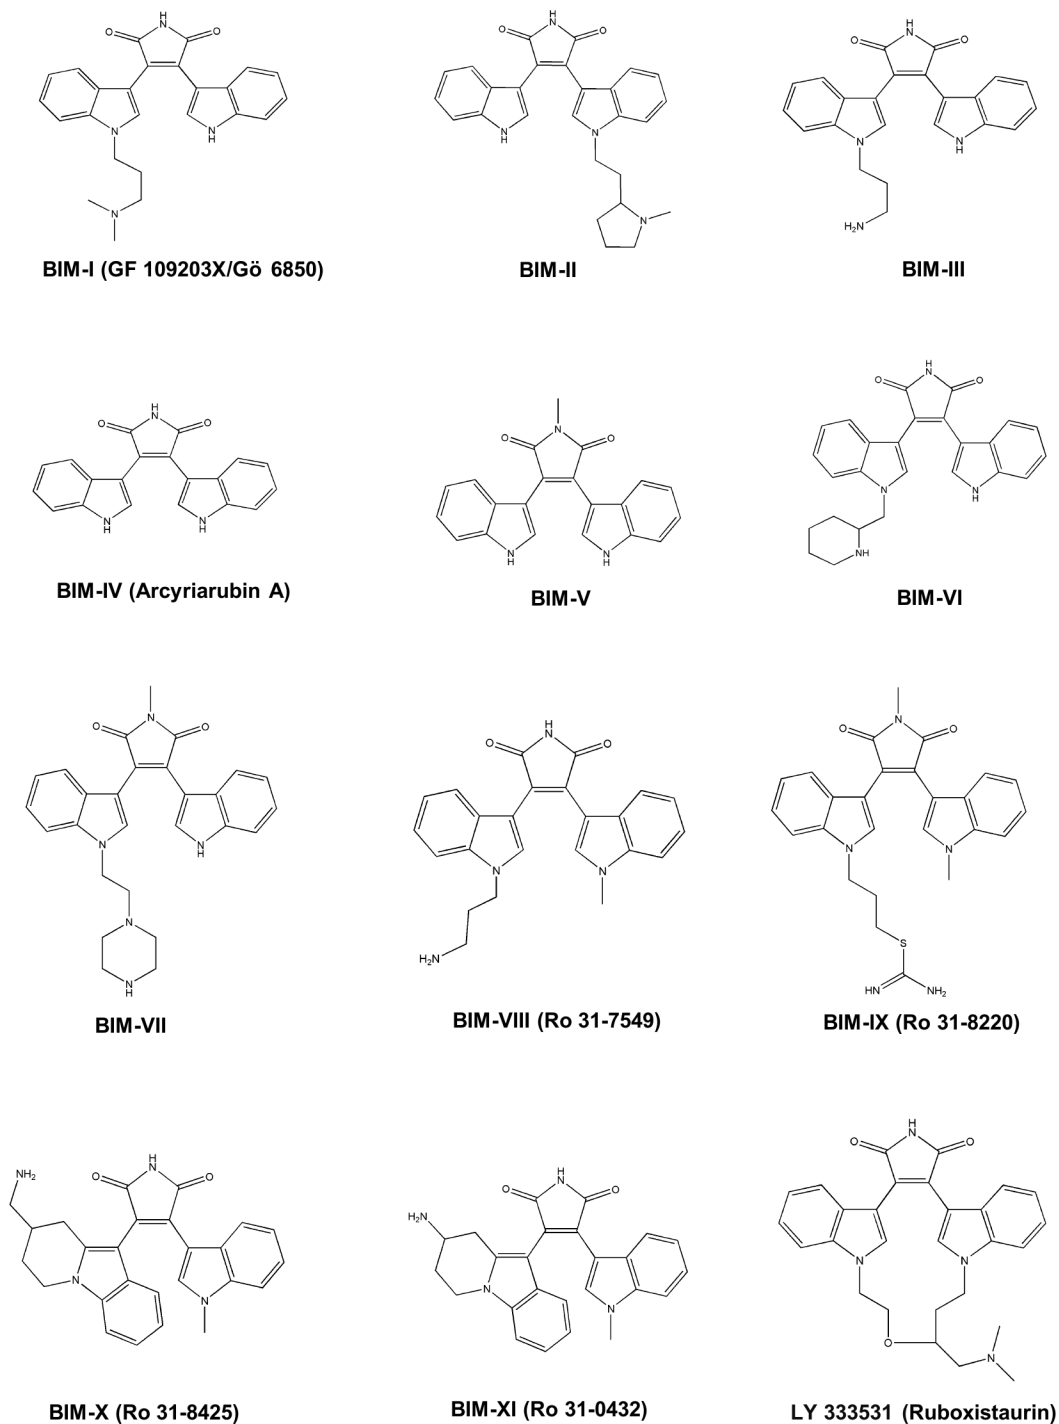

**Fig 1. Chemical structures of BIMs.**

doi:10.1371/journal.pone.0144667.g001

Fallavier, France). [1-<sup>14</sup>C]-TEA (sp. act. 2.4 mCi/mmol) and [<sup>3</sup>H(G)] taurocholic acid (sp. act. 1.19 Ci/mmol) were from Perkin-Elmer (Boston, MA). All other chemicals were commercial products of the highest purity available.

## Cell culture

HEK293 cells overexpressing OCT1 (NM\_003057) (HEK-OCT1 cells), OCT2 (NM\_003058) (HEK-OCT2 cells), MATE1 (NM\_018242) (HEK-MATE1 cells), MATE2-K (NM\_152908) (HEK-MATE2-K cells) or sodium/taurocholate co-transporting polypeptide (NTCP/*SLC10A1*) (NM\_003049) (HEK-NTCP cells) were prepared by transduction of HEK293 cells by a lentiviral pLV-EF1-hOCT1-hPGK-GFP, pLV-EF1-hOCT2-hPGK-GFP, pLV-EF1-hMATE1-hPGK-GFP, pLV-EF1-hMATE2K-hPGK-GFP or pLV-EF1-hNTCP-hPGK-GFP vector, as previously described [28]. Control HEK293 cells (HEK-MOCK cells) were obtained in parallel by transduction of an empty lentiviral PLV-EF1-hPGK-GFP vector. Construction of the lentiviral vectors, production of lentivirus supernatants, transduction of HEK293 cells, cloning and initial characterization of HEK-OCT1, HEK-OCT2, HEK-MATE1, HEK-MATE2-K and HEK-NTCP cells were performed by Vectalys (Labège, France). HEK293 cells were next routinely cultured in DMEM medium supplemented with 10% (vol/vol) fetal calf serum, 100 IU/mL penicillin, 100 µg/mL streptomycin, and 1 µg/mL insulin.

Human highly-differentiated hepatoma HepaRG cells [29], which exhibit functional expression of OCT1 [30], were routinely cultured in Williams' E medium (Life Technologies) supplemented with 10% (vol/vol) fetal calf serum, 100 IU/mL penicillin, 100 µg/mL streptomycin, 5 µg/mL insulin, 2 mM glutamine, and  $5 \times 10^{-5}$  M hydrocortisone hemisuccinate. Additional culture for two weeks in the same medium supplemented with 2% (vol/vol) dimethylsulfoxide was performed in order to get a full hepatocytic differentiation of the cells [30].

## Uptake assays

[1-<sup>14</sup>C] TEA and DAPI uptake assays were performed using a transport assay medium consisting of 5.3 mM KCl, 1.1 mM KH<sub>2</sub>PO<sub>4</sub>, 0.8 mM MgSO<sub>4</sub>, 1.8 mM CaCl<sub>2</sub>, 11 mM D-glucose, 10 mM HEPES, and 136 mM NaCl [28]; pH was adjusted to 7.4 value for OCT1, OCT2 and NTCP assays and to 8.4 value for the pH-sensitive MATE1 and MATE2-K assays. Cells were first washed with transport assay buffer, then incubated at 37°C with transport assay buffer containing 40 µM [1-<sup>14</sup>C] TEA (a reference substrate for OCT1, OCT2, MATE1 and MATE2-K), 43.4 nM [<sup>3</sup>H] taurocholate (a reference substrate for NTCP) or 1 µM DAPI (a substrate for OCT1 [31]), in the absence or presence of BIMs or reference inhibitors, *i.e.*, verapamil for OCT1, MATE1 and MATE2-K, amitriptyline for OCT2, and cyclosporin A for NTCP. The incubation time with substrates was 5 min, that corresponds to the initial linear phase of substrate uptake, notably for OCT1 [28], and is in the range of incubation periods already retained in previous transport studies [32, 33]. Cells were next washed twice with ice-cold phosphate-buffered saline (PBS), and finally lysed in distilled water. DAPI content was next determined using a SpectraMax Gemini SX spectrofluorometer (Molecular Devices, Sunnyvale, CA, USA); excitation and emission wavelengths were 355 and 460 nm, respectively. TEA and taurocholate accumulation were measured by scintillation counting. Data were usually expressed as % of substrate accumulation found in control cells; for OCT1-mediated transport inhibition by BIMs, data were also expressed as % of inhibition of OCT1 activity using the following equation:

$$\% \text{ inhibition of OCT1 activity} = 100 \% - \% \text{ TEA accumulation (in the presence of BIM)}$$

## Trans-stimulation assays

[1-<sup>14</sup>C] TEA trans-stimulation assays were performed in HEK-OCT1 cells as previously described [34]. Cells were first preloaded with 2 mM unlabeled TEA or 10 µM Ro 31-8220 for 60 min at 37°C in the transport assay medium described above. After washing with PBS, cells

were re-incubated with 40  $\mu\text{M}$  [ $1\text{-}^{14}\text{C}$ ] TEA for 5 min at 37°C. Intracellular accumulation of [ $1\text{-}^{14}\text{C}$ ] TEA was then determined by scintillation counting as reported above.

### Kinetic parameters for Ro 31-8220-mediated modulation of drug transporter activities

Half maximal inhibitory concentrations ( $\text{IC}_{50}$ ) for Ro 31-8220-mediated inhibition of OCT1, MATE1 and MATE2-K activities and half maximal effective concentration ( $\text{EC}_{50}$ ) for Ro 31-8220-mediated stimulation of OCT2 activity were determined using Prism software (GraphPad Software, La Jolla, CA) through nonlinear regression based on the four-parameter logistic equation, as previously described [35]. Mode of action for Ro 31-8220-mediated inhibition of OCT1-related TEA uptake was evaluated through graphical analysis of Lineweaver-Burke plots of  $1/v$  ( $v$  is defined as the specific uptake velocity of TEA) as a function of  $1/[\text{TEA}]$ , in the presence and absence of the BIM. Non-linear regression according to the Michaelis-Menten equation was finally performed using Prism software in order to fit  $v$  as a function of  $[\text{TEA}]$  in HEK-OCT2 cells, in the absence or presence of Ro 31-8220, and thus to determine kinetic parameters such as  $K_m$  (Michaelis-Menten constant) and  $V_{\text{max}}$  (maximum specific uptake) values.

### Molecular descriptor generation

Molecular descriptors were evaluated using the Dragon 6 software (Talet, Milano, Italy) that provides 4885 molecular descriptors that are divided into 29 blocks. These blocks include 3D descriptors such as WHIM (Weighted Holistic Invariant Molecular) descriptors, which contain information about the whole 3D molecular structure in terms of size, shape, symmetry and atom distribution [36]. These 3D-WHIM indices are calculated from  $x,y,z$ -coordinates of a 3D structure of the molecule, usually from a spatial conformation of minimum energy, within different weighting schemes in a straightforward manner and represent a very general approach to describe molecules in a unitary conceptual framework. BIMs, initially expressed in SMILES format, were converted to 3D format using the MarvinView software (ChemAxon, Budapest, Hungary) before processing by Dragon 6 to obtain 0D constitutional, 1D structural, 2D topological and 3D geometrical descriptors.

### Immunolocalisation

Immunofluorescence analyses were performed as previously described [28]. Briefly, HEK-OCT1 cells were first fixed in ice-cold acetone for 10 min. Cells were next incubated for 2 h with mouse monoclonal primary antibody directed against OCT1 (Abcam, Cambridge, UK). After washing, an AlexaFluor 488-labeled goat secondary antibody directed against mouse IgG (Invitrogen) was added for 1 h, and nuclei were subsequently stained with 4,6-diamidino-2-phenylindole. Immunofluorescence images were finally detected with an inverted laser scanning confocal Leica DMRXa microscope (Leica, Rueil Malmaison, France).

### Western-blot analysis

Total cellular extracts were prepared as previously reported [37]. Protein lysates (50  $\mu\text{g}$ ) were then separated on polyacrylamide gels and electrophoretically transferred onto nitrocellulose membranes (Bio-Rad, Marne la Coquette, France). After blocking with Tris-buffered saline containing 4% bovine serum albumin and 0.1% Tween 20, membranes were incubated overnight at 4°C with primary antibodies against phospho-extracellular signal-regulated kinase (ERK) and total ERK (Cell Signaling, Danvers, MA). After washing, membranes were next

incubated for 1 h at room temperature with horseradish peroxidase-conjugated secondary antibodies (Dako A/S, Glostrup, Denmark). Immunolabeled proteins were finally visualized by chemiluminescence.

## Statistical analysis

Experimental data were routinely expressed as means  $\pm$  SEM. Statistical analysis was performed using the Student's *t*-test, ANOVA followed by a Dunnett's post-hoc test or F-test using Prism software; the criterion of significance was  $p < 0.05$ . Correlation between molecular descriptor indexes and % of OCT1 activity inhibition by chemicals was initially done with Dragon 6 software through Pearson correlation, using a cut-off for Pearson's correlation coefficient of  $r > 0.8$  (positive correlation) or  $r < -0.8$  (negative correlation), as recommended by the software user's manual. P-values for Pearson correlations, as well as linear regressions for molecular descriptors exhibiting a high level of correlation with OCT1 activity inhibition ( $|r| > 0.9$ ), were next determined using Prism software after confirmation of normality of data distribution by D'Agostino and Pearson omnibus normality test.

## Results

### PKC-independent inhibition of OCT1 activity by Ro 31–8220

Because PKCs have been hypothesized to contribute to regulation of membrane transport of organic cations [38, 39], the effect of Ro 31-8220-mediated inhibition of basal PKC activity on OCT1 activity was initially investigated. For this purpose, we used HEK-OCT1 cells that exhibited a high level of verapamil-inhibitable uptake of the reference OCT1 substrate TEA when compared to control HEK-MOCK cells (S1A Fig), indicating that OCT1 was fully functional in these OCT1-transfected cells, as previously described [28]. As shown in Fig 2A, pre-treatment of HEK-OCT1 cells for 1 h by Ro 31–8220, used at a 2  $\mu$ M concentration fully active against PKCs [4], resulted in a marked inhibition of TEA influx in HEK-OCT1 cells. By contrast, pre-treatment by Ro 31–8220 of HEK-NTCP cells failed to alter intracellular uptake of the NTCP substrate taurocholate (S2 Fig), thus discarding any unspecific general inhibitory effect of the BIM towards SLC transporter activity. OCT1 activity in HEK-OCT1 cells was also inhibited by pre-treatment with the calcium/calmodulin-dependent protein kinase (CaMK) inhibitor KN62 and by the Src kinase inhibitor PP2, used here as positive controls of OCT1 modulation because the calcium/CaMK pathway as well as the Src kinase Lck have been already shown to be involved in OCT1 activity regulation [40]. By contrast, pre-treatment with wortmannin, a chemical inhibitor of phosphatidylinositol-4,5-bisphosphate 3-kinase, failed to alter TEA accumulation in HEK-OCT1 cells (Fig 2A), which agrees with previous data [40]. The MAPK inhibitor U0126 similarly failed to impair OCT1 activity (Fig 2A).

To determine whether down-regulation of OCT1 activity may also occur in response to PKC inhibition by chemical inhibitors distinct from Ro 31–8220, we next pre-treated HEK-OCT1 cells by various structurally-divergent pan-PKC inhibitors, *i.e.*, Gö 6983, staurosporine and chelerythrine, before measuring TEA influx. As shown in Fig 2B, both staurosporine and chelerythrine failed to reduce OCT1 activity, whereas Gö 6983 was only partially active. Staurosporine was however fully active as a potent pan-PKC inhibitor in HEK-OCT1 cells because it fully antagonized the known PKC-mediated activation of the MAPK ERK by the phorbol ester PMA in HEK cells [41] (S3 Fig). This most likely indicates that the inhibitory effect of Ro 31–8220 on OCT1 activity was not related to PKC inhibition. Moreover, activation of PKCs by PMA treatment failed to modify TEA accumulation in HEK-OCT1 cells (Fig 2C), which also does not argue in favor of a regulation of OCT1 activity by PKCs.

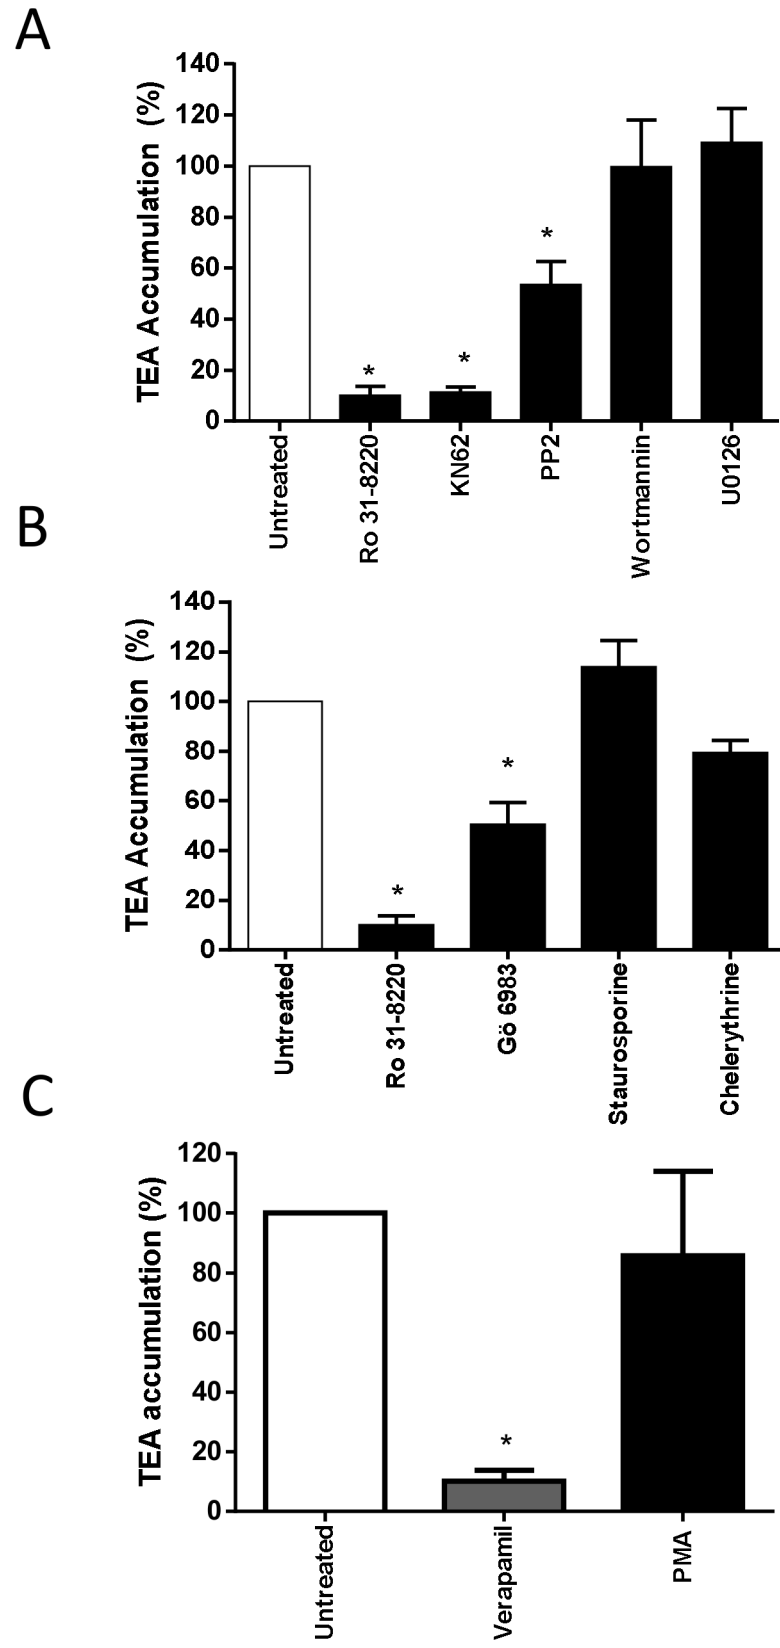

**Fig 2. Effect of PKC and other signaling pathways inhibition on OCT1 activity.** HEK-OCT1 cells were exposed, or not, for 1 h to (A) 2  $\mu$ M Ro 31–8220, 20  $\mu$ M KN62, 20  $\mu$ M PP2, 200 nM wortmannin or 5  $\mu$ M U0126, (B) 2  $\mu$ M Ro 31–8220, 5  $\mu$ M Gö 6983, 1  $\mu$ M staurosporine or 50  $\mu$ M chelerythrine or (C) 100 nM PMA. Cells were next incubated with 40  $\mu$ M [ $^{14}$ C]-TEA for 5 min at 37°C in the (A–C) absence or (C) presence of 50  $\mu$ M verapamil, used here as a reference OCT1 inhibitor. After washing with ice-cold PBS, intracellular accumulation of TEA was determined by scintillation counting. Data are expressed as % of accumulation of TEA found in untreated control cells, set at 100%, and are the means  $\pm$  SEM of at least three independent experiments. \*,  $p < 0.05$  when compared with untreated cells (ANOVA followed by Dunnett's post-hoc test).

doi:10.1371/journal.pone.0144667.g002

## Direct *cis*-inhibition of OCT1 activity by Ro 31–8220

To investigate the features of the PKC-independent inhibition of OCT1 activity by Ro 31–8220, we first analyzed the effects of the BIM on OCT1 localization in HEK-OCT1 cells, because rapid retrieval of transporters from plasma membrane is a well-established cause of down-regulation of transporter activity [42, 43]. As shown in S4 Fig, exposure to Ro 31–8220 failed to obviously alter plasma membrane expression of OCT1. We next determined whether the BIM may directly *cis*-inhibit OCT1 like verapamil and other OCT inhibitors. Simultaneous incubation with TEA and 2  $\mu$ M Ro 31–8220 for a short time (5 min) resulted in a marked inhibition of TEA accumulation in HEK-OCT1 cells and also in human hepatoma HepaRG cells (Fig 3A), which constitutively exhibit OCT1 activity in an hepatic environment [30]. This *cis*-inhibition of OCT1-mediated TEA accumulation by Ro 31–8220 was found to be concentration-dependent, with an  $IC_{50}$  of  $0.18 \pm 0.05$   $\mu$ M (Fig 3B). In addition to uptake of TEA, that of the OCT1 substrate DAPI was found to be markedly inhibited by 2  $\mu$ M Ro 31–8220 in HEK-OCT1 cells (Fig 3C); the reference OCT1 inhibitor verapamil similarly inhibited DAPI uptake. Finally, to test the putative reversibility of Ro 31–8220-mediated OCT1 inhibition, HEK-OCT1 cells were first incubated with Ro 31–8220 or verapamil for 5 min, washed and re-incubated in drug-free culture medium for 1 h, before analysis of OCT1-mediated TEA transport. As shown in Fig 3D, cells pre-incubated with Ro 31–8220 exhibited strong inhibition of OCT1-mediated TEA accumulation, in contrast to counterparts pre-incubated with verapamil, which displayed only marginal, although significant, inhibition of TEA uptake. Such data consequently indicate that OCT1 inhibition caused by Ro 31–8220 was not reversible, in contrast to that due to verapamil.

Mode of action for Ro 31–8220-mediated inhibition of OCT1 activity was next evaluated through graphical analysis of Lineweaver-Burke plots of  $1/v$  versus  $1/[TEA]$  in the presence or absence of the BIM. As shown in Fig 4, the plots were consistent with a mixed inhibition of OCT1 activity by Ro 31–8220, *i.e.*, the intercept of the plots with or without the BIM was out of the x-axis and the y-axis.

Finally, we investigated whether Ro 31–8220 can *trans*-stimulate TEA uptake, which may constitute an argument in favor of the transport of the BIM by OCT1 [34]. As shown in Fig 5, pre-loading with Ro 31–8220 resulted in *trans*-inhibition of radiolabeled TEA uptake. By contrast, pre-loading with unlabeled TEA led to a *trans*-stimulation of radiolabeled TEA uptake (Fig 5), as expected for an OCT1 substrate like TEA [34].

## Effect of various BIMs on OCT1 activity

To determine whether the inhibitory effect of Ro 31–8220 towards OCT1 activity may be shared by structural analogs, the effects of various BIMs and of the PKC inhibitor LY 333531, which also contains a BIM core (Fig 1), on OCT1-mediated transport were studied. In addition to Ro 31–8220, several BIMs such as BIM-I, BIM-II, BIM-III, BIM-VI, BIM-VII, BIM-VIII (also known as Ro 31–7549) and LY 333531 significantly inhibited OCT1-mediated TEA accumulation in HEK-OCT1 cells by more than 50% when compared to control TEA uptake



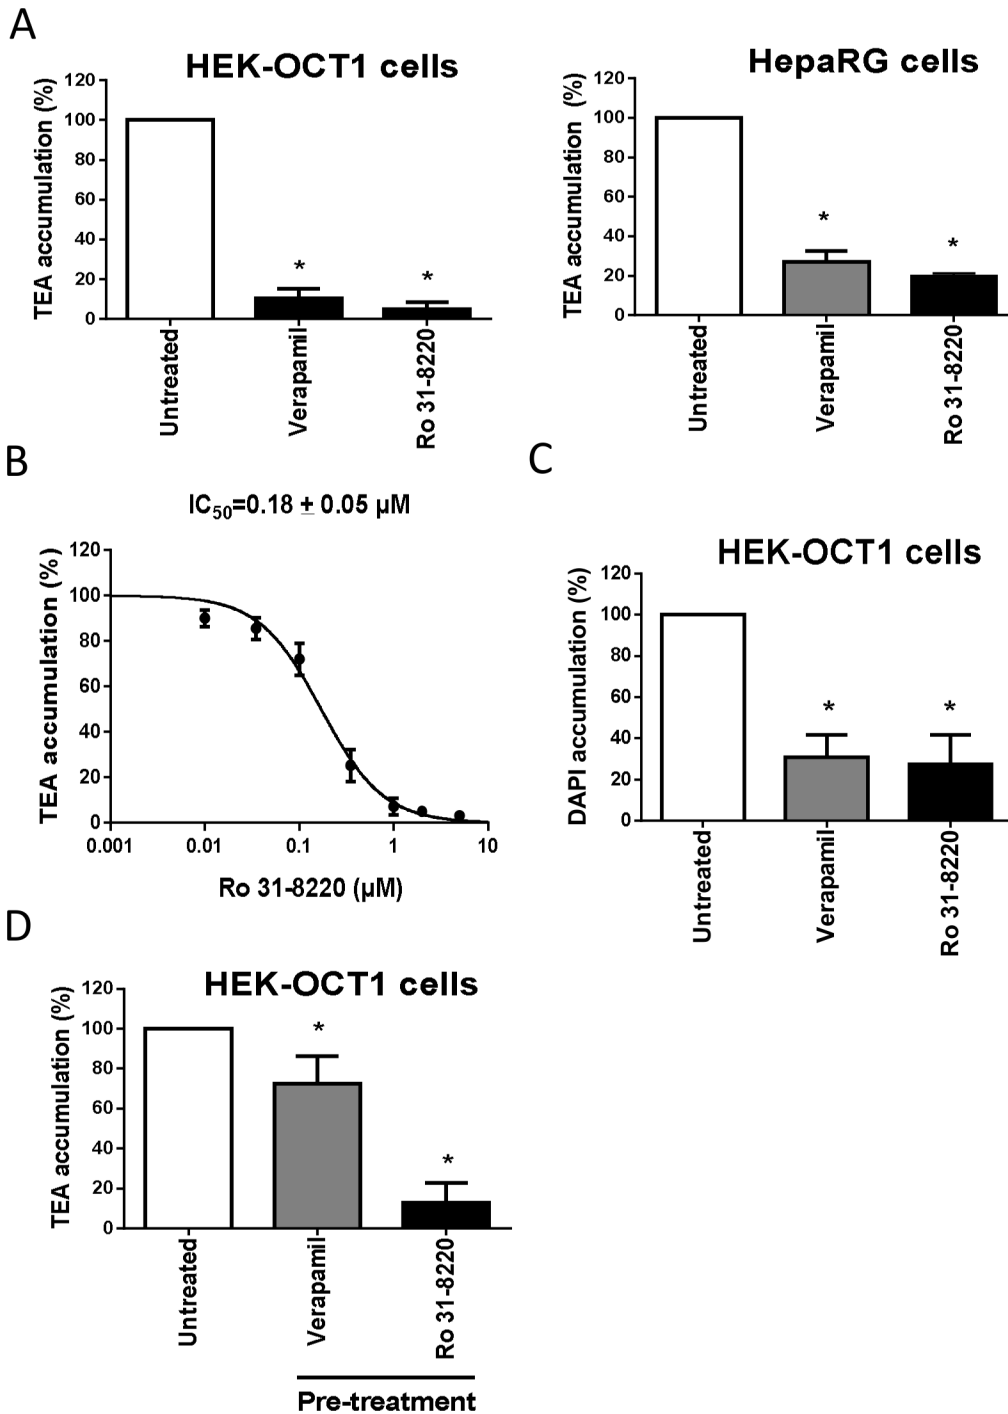

**Fig 3. Direct cis-inhibition of OCT1 activity by Ro 31-8220.** (A) HEK-OCT1 and HepaRG cells were incubated with 40  $\mu M$  [ $^{14}C$ ]-TEA for 5 min at 37°C, in the presence or absence of 50  $\mu M$  verapamil or 2  $\mu M$  Ro 31-8220. After washing with ice-cold PBS, intracellular accumulation of TEA was determined by scintillation counting. Data are expressed as % of accumulation of TEA found in control cells, set at 100%, and are the means  $\pm$  SEM of at least three independent experiments. \*,  $p < 0.05$  when compared with untreated cells (ANOVA followed by Dunnett's post-hoc test). (B) HEK-OCT1 cells were incubated with 40  $\mu M$  [ $^{14}C$ ]-TEA for 5 min at 37°C, in the presence of various concentrations of Ro 31-8220 (from 0 to 10  $\mu M$ ). After washing with ice-cold PBS, intracellular accumulation of TEA was determined by scintillation counting. Data are expressed as % of accumulation of TEA found in control cells, set at 100%, and are the means  $\pm$  SEM of four independent experiments. Ro 31-8220  $IC_{50}$  value is indicated at the top of the graph. (C) HEK-OCT1 cells were incubated with 1  $\mu M$  DAPI for 5 min at 37°C, in the presence or absence of 50  $\mu M$  verapamil or 2  $\mu M$  Ro 31-8220. After washing with ice-cold PBS, accumulation of DAPI was determined by spectrofluorimetry as described in Materials and Methods. Data are expressed as percentage of DAPI accumulation in control cells and are the means  $\pm$  SEM of four independent experiments. \*,  $p < 0.05$  when compared with untreated cells (ANOVA followed

by Dunnett's post-hoc test). (D) HEK-OCT1 cells were either untreated or exposed to 50  $\mu\text{M}$  verapamil or 10  $\mu\text{M}$  Ro 31-8220 for 5 min. After washing, cells were re-incubated in drug-free culture medium for 1 h. Cells were next incubated with 40  $\mu\text{M}$  [ $^{14}\text{C}$ ]TEA for 5 min at 37°C. Intracellular accumulation of labelled TEA was then determined by scintillation counting. Data are expressed as % of accumulation of TEA found in untreated control cells, set at 100%, and are the means  $\pm$  SEM of three independent experiments. \*,  $p < 0.05$  when compared with untreated cells (ANOVA followed by Dunnett's post-hoc test).

doi:10.1371/journal.pone.0144667.g003

(Fig 6). By contrast, BIM-IV (also known as Arcyriarubin A), BIM-V, BIM-X (also known as Ro 31-8425) and BIM-XI (also known as Ro 31-0432) failed to significantly alter TEA accumulation (Fig 6).

In order to identify the specific physico-chemical properties associated to OCT1 inhibition for BIMs, molecular descriptors, including 0D-constitutional, 1D-structural, 2D-topological and 3D-geometrical descriptors, were determined using Dragon 6 software. Putative correlations with OCT1 activity inhibition were next analyzed using Pearson's correlation test. Using a cutoff of  $|r| > 0.8$ , 209 molecular descriptors were found to be correlated with inhibition of OCT1 activity; the correlation was positive ( $r > 0.8$ ) or negative ( $r < -0.8$ ) for 170 and 37 descriptors, respectively (Table 1). These molecular descriptors associated with OCT1 inhibition belong to different blocks of descriptors, especially those of 2D-matrix descriptors ( $n = 82$ ), of 3D-RDF (Radial Distribution Function) descriptors ( $n = 20$ ), of 3D-WHIM descriptors ( $n = 25$ ) and of 3D GETAWAY (Geometry, Topology and Atom-Weights Assembly) descriptors ( $n = 16$ ) (Table 1). When a more stringent cut-off value of  $|r| > 0.9$  was applied, 13 molecular descriptors were found to be correlated with OCT1 activity inhibition (Table 2); linear regression analysis indicated a highly significant positive linear relation between the index values of these descriptors and the % of OCT1 activity inhibition (S5 Fig). Most of these molecular descriptors belong to the 3D-WHIM category of descriptors and concern notably total size indexes unweighted ( $A_u$  and  $V_u$ ) or weighted by various parameters such as van der Waals volume ( $A_v$  and  $V_v$ ), polarizability ( $A_p$  and  $V_p$ ) or ionization potential ( $A_i$  and  $V_i$ ) (Table 2).

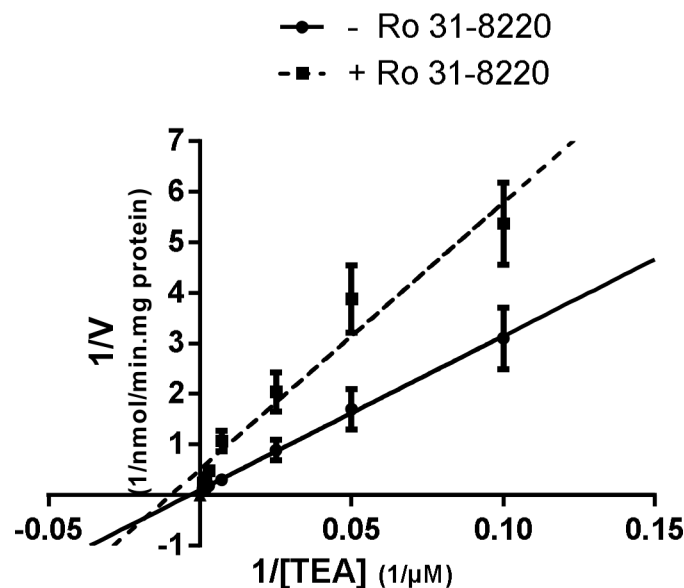

**Fig 4. Lineweaver-Burk plot of the inhibitory effect of Ro 31-8220 on TEA uptake in HEK-OCT1 cells.** HEK-OCT1 cells were incubated with various concentrations of TEA (from 10 to 1040  $\mu\text{M}$ ) for 5 min at 37°C, in the absence or presence of 0.5  $\mu\text{M}$  Ro 31-8220. After washing with ice-cold PBS, intracellular accumulation of TEA was determined by scintillation counting and normalized to total protein content. Data shown are the means  $\pm$  SEM of four independent experiments.

doi:10.1371/journal.pone.0144667.g004

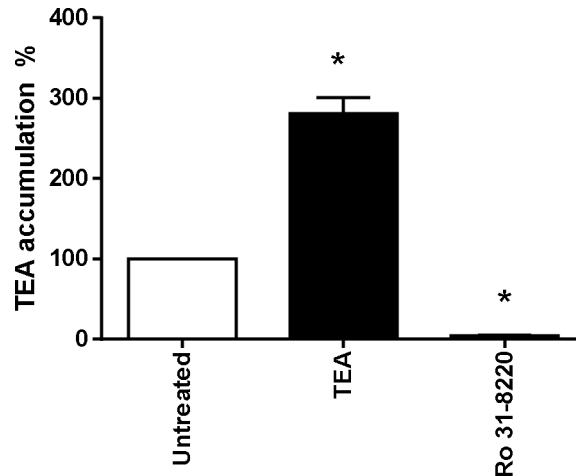

**Fig 5. Trans-inhibition of OCT1 activity by Ro 31-8220.** HEK-OCT1 cells were either untreated or exposed to 2 mM unlabelled TEA or 10  $\mu$ M Ro 31-8220 for 1 h. After washing, cells were next incubated with 40  $\mu$ M [ $^{14}$ C]TEA for 5 min at 37°C. Intracellular accumulation of labelled TEA was then determined by scintillation counting. Data are expressed as % of accumulation of TEA found in untreated control cells, set at 100%, and are the means  $\pm$  SEM of four independent experiments. \*,  $p < 0.05$  when compared with untreated cells (ANOVA followed by Dunnett's post-hoc test).

doi:10.1371/journal.pone.0144667.g005

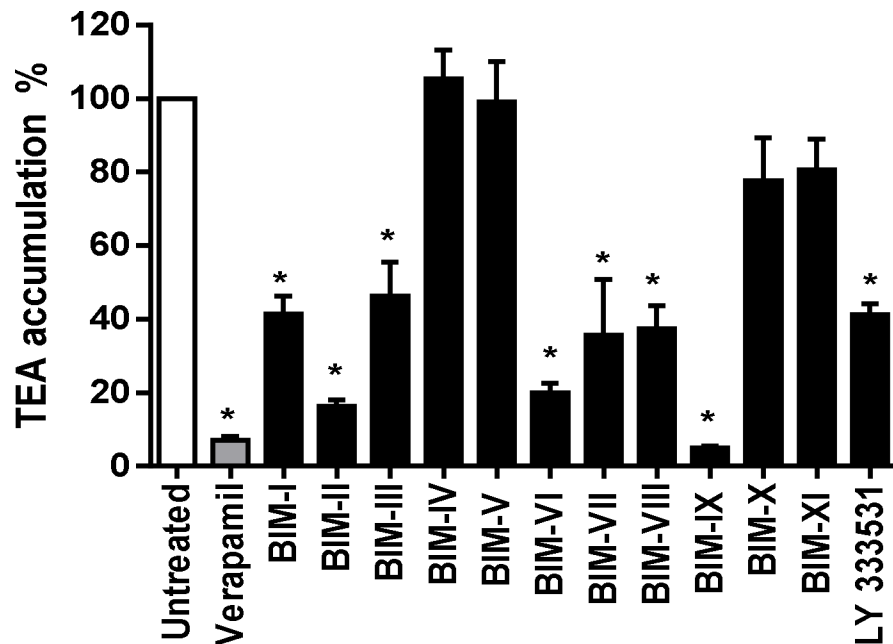

**Fig 6. Inhibition of OCT1 activity by various BIM-related molecules.** HEK-OCT1 cells were incubated with 40  $\mu$ M [ $^{14}$ C]-TEA for 5 min at 37°C in the presence or absence of 50  $\mu$ M verapamil or of various BIMs, used each at 5  $\mu$ M. After washing with ice-cold PBS, intracellular accumulation of [ $^{14}$ C]-TEA was determined by scintillation counting. Data are expressed as % of accumulation of TEA found in control cells, set at 100%, and are the means  $\pm$  SEM of three independent experiments. \*,  $p < 0.05$  when compared with untreated cells (ANOVA followed by Dunnett's post-hoc test).

doi:10.1371/journal.pone.0144667.g006

**Table 1. Repartition of molecular descriptors correlated with OCT1 activity inhibition for BIMs ( $|r|>0.80$ ).**

| Dragon ID Block | Block category | Block description           | Number of descriptors | Number of correlated descriptors   |                                     | % of correlated descriptors in each block |
|-----------------|----------------|-----------------------------|-----------------------|------------------------------------|-------------------------------------|-------------------------------------------|
|                 |                |                             |                       | Positive correlation ( $r > 0.8$ ) | Negative correlation ( $r < -0.8$ ) |                                           |
| 1               | 0D-descriptors | Constitutional descriptors  | 43                    | 0                                  | 0                                   | 0.0                                       |
| 2               | 0D-descriptors | Ring descriptors            | 32                    | 0                                  | 0                                   | 0.0                                       |
| 3               | 2D-descriptors | Topological indices         | 75                    | 11                                 | 0                                   | 14.7                                      |
| 4               | 2D-descriptors | Walk and path counts        | 46                    | 0                                  | 0                                   | 0.0                                       |
| 5               | 2D-descriptors | Connectivity indices        | 37                    | 1                                  | 0                                   | 2.7                                       |
| 6               | 2D-descriptors | Information indices         | 48                    | 3                                  | 0                                   | 6.3                                       |
| 7               | 2D-descriptors | 2D matrix-based descriptors | 550                   | 82                                 | 7                                   | 16.2                                      |
| 8               | 2D-descriptors | 2D autocorrelations         | 213                   | 2                                  | 0                                   | 0.9                                       |
| 9               | 2D-descriptors | Burden eigenvalues          | 96                    | 0                                  | 0                                   | 0.0                                       |
| 10              | 2D-descriptors | P_VSA-like descriptors      | 45                    | 0                                  | 0                                   | 0.0                                       |
| 11              | 2D-descriptors | ETA indices                 | 23                    | 0                                  | 0                                   | 0.0                                       |
| 12              | 2D-descriptors | Edge adjacency indices      | 324                   | 0                                  | 0                                   | 0.0                                       |
| 13              | 3D-descriptors | Geometrical descriptors     | 38                    | 3                                  | 0                                   | 7.9                                       |
| 14              | 3D-descriptors | 3D matrix-based descriptors | 90                    | 4                                  | 4                                   | 8.9                                       |
| 15              | 3D-descriptors | 3D autocorrelations         | 80                    | 5                                  | 9                                   | 17.5                                      |
| 16              | 3D-descriptors | RDF descriptors             | 210                   | 20                                 | 0                                   | 9.5                                       |
| 17              | 3D-descriptors | 3D-MoRSE descriptors        | 224                   | 6                                  | 0                                   | 2.2                                       |
| 18              | 3D-descriptors | WHIM descriptors            | 114                   | 25                                 | 0                                   | 21.9                                      |
| 19              | 3D-descriptors | GETAWAY descriptors         | 273                   | 0                                  | 16                                  | 5.9                                       |
| 20              | 3D-descriptors | Randic molecular profiles   | 41                    | 5                                  | 0                                   | 12.2                                      |
| 21              | 0D-descriptors | Functional group counts     | 154                   | 0                                  | 0                                   | 0.0                                       |
| 22              | 1D-descriptors | Atom-centred fragments      | 115                   | 0                                  | 0                                   | 0.0                                       |
| 23              | 1D-descriptors | Atom-type E-state indices   | 170                   | 0                                  | 0                                   | 0.0                                       |
| 24              | 2D-descriptors | CATS 2D                     | 150                   | 0                                  | 0                                   | 0.0                                       |
| 25              | 2D-descriptors | 2D Atom Pairs               | 1596                  | 3                                  | 0                                   | 0.1                                       |

(Continued)

Table 1. (Continued)

| Dragon ID Block | Block category | Block description    | Number of descriptors | Number of correlated descriptors |                                 | % of correlated descriptors in each block |
|-----------------|----------------|----------------------|-----------------------|----------------------------------|---------------------------------|-------------------------------------------|
|                 |                |                      |                       | Positive correlation (r > 0.8)   | Negative correlation (r < -0.8) |                                           |
| 26              | 3D-descriptors | 3D Atom Pairs        | 36                    | 0                                | 0                               | 0.0                                       |
| 27              | others         | Charge descriptors   | 15                    | 2                                | 1                               | 20.0                                      |
| 28              | others         | Molecular properties | 20                    | 0                                | 0                               | 0.0                                       |
| 29              | others         | Drug-like indices    | 27                    | 0                                | 0                               | 0.0                                       |

doi:10.1371/journal.pone.0144667.t001

### Effect of Ro 31–8220 on OCT2, MATE1 and MATE2-K activities

The effects of Ro 31–8220 on activity of organic cation transporters sharing functional features with OCT1 such as OCT2, MATE1 and MATE2-K [44] were finally determined. For this purpose, we used HEK-OCT2 cells, exhibiting high level of amitriptyline-inhibitable uptake of TEA when compared to HEK-MOCK cells (S1B Fig) and HEK-MATE1 and HEK-MATE2-K cells displaying high level of verapamil-inhibitable uptake of TEA comparatively to HEK-MOCK cells (S1C Fig). Surprisingly, Ro 31–8220 used at 5 μM, in contrast to the reference OCT2 inhibitor amitriptyline, was found to enhance TEA accumulation in HEK-OCT2 cells (Fig 7A, Left). This effect was concentration-dependent, with an EC<sub>50</sub> of 0.40 ± 0.01 μM (Fig 7A, Right). Determination of kinetic parameters (K<sub>m</sub> and V<sub>max</sub>) of OCT2-mediated accumulation of TEA in the absence or presence of Ro 31–8220 next revealed that the BIM significantly decreased K<sub>m</sub> value by a 2.8-fold-factor (S6 Fig). By contrast, Ro 31–8220 failed to enhance accumulation of TEA in HEK-MOCK cells (data not shown). Ro 31–8220 was next found to inhibit TEA accumulation in both HEK-MATE1 and HEK-MATE2-K cells (Fig 7B, Left and Fig 7C, Left). Such effects, also observed with the reference MATE inhibitor verapamil, were concentration-dependent, with Ro 31–8220 IC<sub>50</sub> of 0.039 ± 0.006 μM and 0.19 ± 0.07 μM for MATE1 and MATE2-K, respectively (Fig 7B, Right and Fig 7C, Right).

### Discussion

Various off-targets have already been described for the potent PKC inhibitor Ro 31–8220, including blockage of the ABC transporter BCRP [25]. The data reported in the present study

Table 2. Molecular descriptors highly correlated with OCT1 activity inhibition for BIMs (r>0.90).

| Block description           | Descriptor ID | Significance                                                 | r      | p-value  |
|-----------------------------|---------------|--------------------------------------------------------------|--------|----------|
| <b>3D-MorSE descriptors</b> | Mor02s        | Signal 02 / weighted by I-stat                               | 0.9297 | < 0.0001 |
| <b>3D-WHIM descriptors</b>  | Au            | A total size index / unweighted                              | 0.9462 | < 0.0001 |
|                             | Am            | A total size index / weighted by mass                        | 0.9437 | < 0.0001 |
|                             | Av            | A total size index / weighted by van der Waals volume        | 0.9463 | < 0.0001 |
|                             | Ae            | A total size index / weighted by Sanderson electronegativity | 0.9505 | < 0.0001 |
|                             | Ap            | A total size index / weighted by polarizability              | 0.9382 | < 0.0001 |
|                             | Ai            | A total size index / weighted by ionization potential        | 0.9488 | < 0.0001 |
|                             | As            | A total size index / weighted by I-stat                      | 0.9241 | < 0.0001 |
|                             | Vu            | V total size index / unweighted                              | 0.9131 | < 0.0001 |
|                             | Vv            | V total size index / weighted by van der Waals volume        | 0.9079 | < 0.0001 |
|                             | Vp            | V total size index/ weighted by polarizability               | 0.9226 | < 0.0001 |
|                             | Vi            | V total size index / weighted by ionization potential        | 0.9038 | < 0.0001 |
| <b>2D atom pairs</b>        | F10[C-N]      | Frequency of C—N at topological distance 10                  | 0.9123 | <0.0001  |

doi:10.1371/journal.pone.0144667.t002

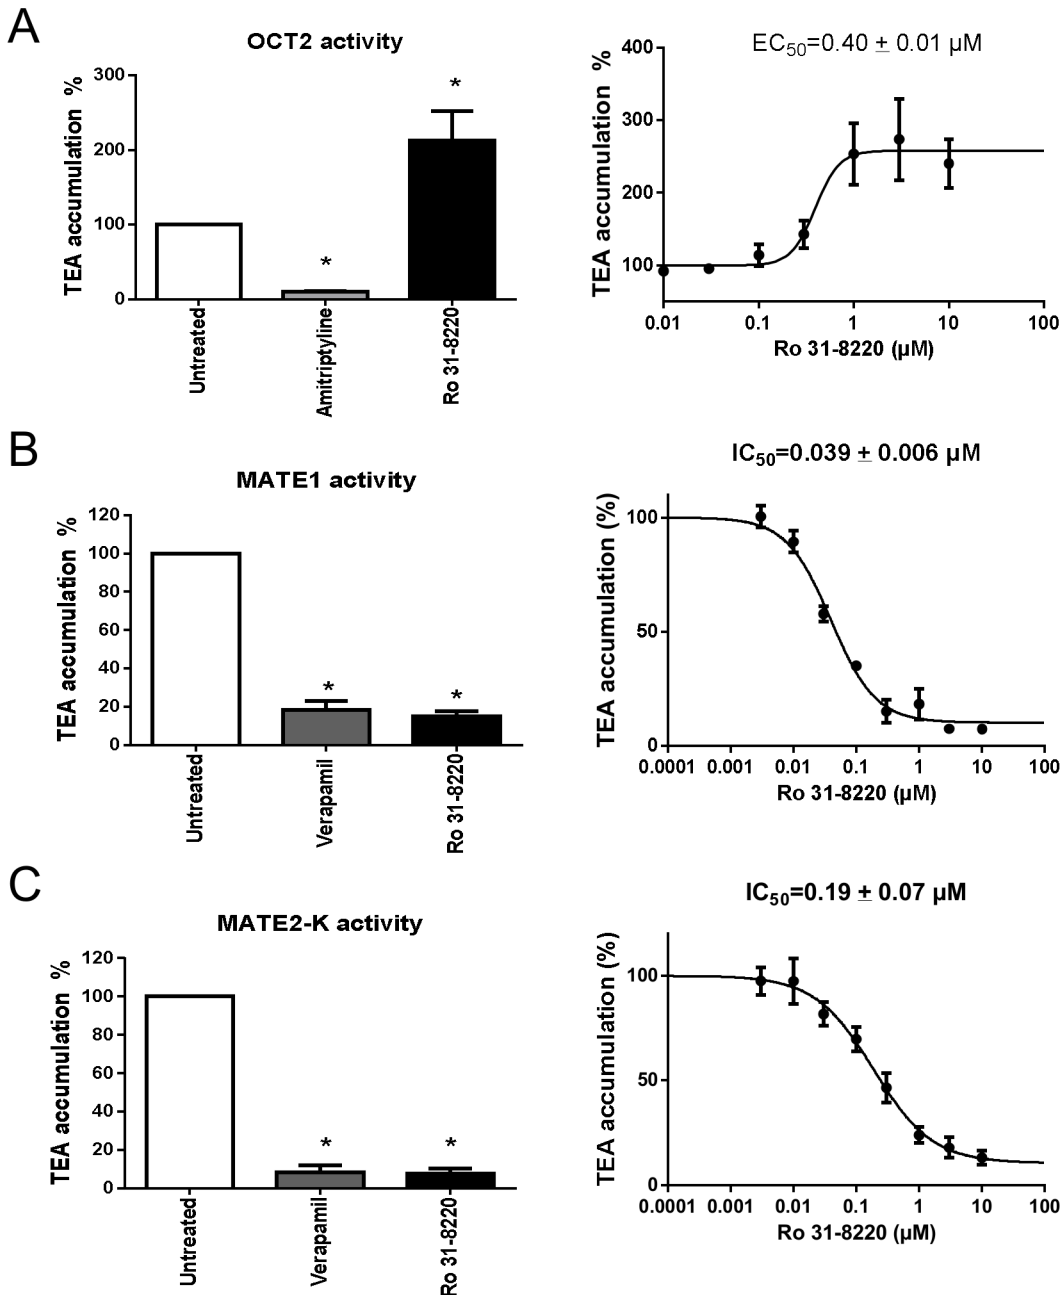

**Fig 7. Effect of Ro 31-8220 on OCT2, MATE1 and MATE2-K activities.** (A) HEK-OCT2 cells were incubated with 40  $\mu M$  [ $^{14}C$ ]-TEA for 5 min at 37°C and pH = 7.4, in the presence or absence of (Left) 500  $\mu M$  amitriptyline or 5  $\mu M$  Ro 31-8220, or of (Right) various concentrations (from 0.01 to 10  $\mu M$ ) of Ro 31-8220. After washing by ice-cold PBS, intracellular accumulation of TEA was determined by scintillation counting. Data are expressed as % of accumulation of TEA found in control cells, set at 100%, and are the means  $\pm$  SEM of three independent experiments. (Left) \*,  $p < 0.05$  when compared with untreated cells (ANOVA followed by Dunnett's post-hoc test); (Right) Ro 31-8220  $EC_{50}$  value towards OCT2 activity is indicated at the top of the graph. (B) HEK-MATE1 or (C) HEK-MATE2-K cells were incubated with 40  $\mu M$  [ $^{14}C$ ]-TEA for 5 min at 37°C and pH = 8.4, in the presence or absence of (Left) 200  $\mu M$  verapamil or 5  $\mu M$  Ro 31-8220, or of (Right) various concentrations (from 0.003 to 10  $\mu M$ ) of Ro 31-8220. After washing by ice-cold PBS, intracellular accumulation of TEA was determined by scintillation counting. Data are expressed as % of accumulation of TEA found in control cells, set at 100%, and are the means  $\pm$  SEM of three independent experiments. (Left) \*,  $p < 0.05$  when compared with untreated cells (ANOVA followed by Dunnett's post-hoc test); (Right) Ro 31-8220  $IC_{50}$  or values towards (B) MATE1 and (C) MATE2-K activities are indicated at the top of the graphs.

doi:10.1371/journal.pone.0144667.g007

extend these PKC-independent effects of the BIM to organic cation transporters, especially OCT1. Indeed, Ro 31-8220 was found to block transport of the reference OCT1 substrates TEA and DAPI in HEK-OCT1 cells. This inhibition of OCT1 activity by the BIM was not observed in response to BIM-independent PKC inhibitors such as staurosporine and chelerythrine; moreover, some BIMs known to inhibit PKCs such as BIM-IV, BIM-X and BIM-XI [1, 4] also failed to inhibit OCT1 activity, thus fully indicating that Ro 31-8220-mediated inhibition of OCT1 activity is not dependent on PKC inhibition. In addition, the fact that activation of PKCs by the phorbol ester PMA failed to regulate OCT1 activity demonstrates a PKC-independent functionality of the OCT1 transporter, which does not argue in favor of PKC inhibition involvement in Ro 31-8220 effects towards OCT1 activity.

The PKC-independent mechanism by which Ro 31-8220 inhibits OCT1 activity remains to be determined. An unspecific and general inhibitory effect of Ro 31-8220 towards SLC transporters can be discarded because (i) this compound failed to alter activity of the bile salt transporter Ntcp and (ii) it stimulated, and did not inhibit, OCT2 activity. An effect of Ro 31-8220 towards expression level of OCT1 at the membrane is similarly very unlikely to contribute to inhibition of OCT1 activity because the BIM failed to alter membrane location of the transporter, as demonstrated by immunocytochemistry studies. In fact, Ro 31-8220 most likely inhibits OCT1 by directly binding to the transporter, as usually described for inhibitors of ABC and SLC transporters [45]. The inhibition of OCT1 activity by the PKC inhibitor was moreover not reversible, in contrast to that due to verapamil, thus suggesting that Ro 31-8220 binding to OCT1 is irreversible. Interestingly, analysis of the mechanism of inhibition using Lineweaver-Burke plots suggests a mixed inhibition of OCT1 activity by Ro 31-8220. This type of inhibition is mostly allosteric in nature, where the inhibitor binds to a site other than the active site to cause a conformational change in the transporter structure, reducing the affinity of substrate for the active site. The fact that Ro 31-8220 is not a substrate for OCT1, as demonstrated by the absence of *trans*-stimulation effect, also supports a binding of the BIM outside the active site of transport. The presence of binding sites for inhibitors that may be distinct from the active site remain however to be formally determined for human OCT1. By contrast, for rat Oct1, both low affinity substrate binding sites and high affinity substrate binding sites, that can mediate inhibition via non-transported compounds, have been reported [46].

Besides Ro 31-8220, several other BIMs blocked OCT1 activity. Various molecular descriptors correlated with % of inhibition of OCT1 activity by these BIMs. These descriptors belong to different blocks of 2D-topological and 3D-geometrical descriptors, indicating that various physico-chemical parameters are likely to contribute to OCT1 inhibition by BIMs. Some 3D-WHIM descriptors corresponding to total size indexes of the 3D molecular structure of BIMs, unweighted or weighted by van der Waals volume, polarizability or ionization potential, were found to be highly correlated with inhibition of OCT1 activity by BIMs and to exhibit a linear relation with % of OCT1 activity inhibition. This suggests that these 3D-WHIM descriptors correspond to crucial molecular descriptors, that may have to be priority considered for OCT1-mediated transport blockage. Interestingly, OCT1 inhibition may represent a promising way for treatment of hepatic steatosis such as non-alcoholic fatty liver disease, through inhibition of OCT1-mediated thiamine transport and subsequent activation of the energy sensor AMP-activated kinase [27]. Further studies are therefore likely required to confirm the relevance of 3D-WHIM descriptors for getting potent OCT1 inhibitors and, beyond, to more accurately determine the physico-chemical parameters important for blocking OCT1 activity.

In addition to OCT1, other organic cation transporters such as OCT2, MATE1 and MATE2-K were also impacted by Ro 31-8220. Indeed, the BIM markedly inhibited MATE1- and MATE2-K-mediated transport of TEA, with low  $IC_{50}$  values, *i.e.*, in the 0.01–0.1  $\mu$ M range, which clearly positions it as a potent inhibitor of MATE1 and MATE-2K activity. These

data therefore confirm that OCT1, MATE1 and MATE2-K, with share common substrates such as TEA and metformin, also share common inhibitors such as Ro 31-8220. Various compounds such as pentimidine or mitoxantrone have also been demonstrated to inhibit these three SLC transporters, whereas other inhibitors such as ondansetron more specifically block MATE1 and MATE2-K or even target only MATE1 such as pantoprazole [47]. Additional studies are likely required to better understand the molecular basis of these differential patterns of inhibition of organic cation transporters by various chemicals. With respect to OCT2 activity, it was unexpectedly *cis*-stimulated by Ro 31-8220. This effect was concentration-dependent, with an EC<sub>50</sub> value (0.40 μM) close to IC<sub>50</sub> values for OCT1, MATE1 and MATE2-K inhibition, indicating that the same range of Ro 31-8220 concentrations either inhibits OCT1, MATE1 and MATE2-K or stimulates activity of OCT2. Ro 31-8220 likely *cis*-stimulated OCT2-mediated transport of TEA through enhancing the affinity of TEA to OCT2, as suggested by the decrease of the kinetic parameter K<sub>m</sub> in response to the BIM. *Cis*-stimulation of transporter activity by chemicals is rather poorly documented for OCT2 in the literature, but has been described for other transporters, notably MRP2 (*ABCC2*) [48], organic anion-transporting polypeptide (OATP) 1B1 (*SLCO1B1*) and OATP1B3 (*SLCO1B3*) [49, 50]. The exact mechanism involved in such stimulation of transporter activities remains to be determined. For MRP2, it may be linked to the presence of two similar but non-identical ligand binding sites: one site from which substrate is transported and a second site that regulates the affinity of the transport site for the substrate, and to which stimulators may bind [51]. Further studies are required to determine whether OCT2 stimulation by Ro 31-8220 also requires a regulatory binding site.

The interactions of Ro 31-8220 with organic cation transporters have likely to be kept in mind when using this BIM as a pan-PKC inhibitor in experimental studies. Indeed, PKC inhibition in response to Ro 31-8220 is usually achieved with Ro 31-8220 concentrations ranging from 1 to 10 μM [52, 53], which are also highly effective towards OCT1, OCT2, MATE1 and MATE2-K, thus precluding the use of Ro 31-8220 or other BIMs for specifically analyzing putative PKC-dependent regulation of these organic cation transporters. Moreover, the use of Ro 31-8220 with cells expressing at least one of the targeted organic cation transporters is likely to inhibit transport of endogenous compound substrates for these transporters such as catecholamines (handled by OCT1 and OCT2) [54] or thiamine (handled by OCT1) [27], which may result in phenotypic effects irrelevant from PKC inhibition. Interactions of BIMs with organic cation transporters have also to deserve attention with respect to the potential clinical use of BIMs. Indeed, these compounds, such as LY 333531, have entered or are susceptible to enter clinical trials for the treatment of various diseases [55], including diabetic peripheral neuropathy [56], diabetic retinopathy [57] and cancers [58]. In this context, putative inhibition of organic cation transporters in BIMs-treated patients have likely to be considered owing to (i) potential drug-drug interactions through alteration of OCT/MATE-related pharmacokinetics features of co-administrated drugs and (ii) potential adverse effects due to inhibition of OCT/MATE-mediated transport of endogenous substrates. Additional studies are therefore required to determine whether Ro 31-8220 and other BIMs may inhibit *in vivo* activity of OCT/MATE and to characterize putative pharmacokinetics relevance.

In summary, the nature of cellular off-targets of the PKC inhibitor Ro 31-8220 and of other BIMs-related molecules was extended to organic cation transporters, especially OCT1. Such PKC-independent alterations of organic cation transport have likely to be kept in mind when using Ro 31-8220 and other BIMs as PKC inhibitors in experimental or clinical studies.



## Supporting Information

**S1 Fig. Accumulation of TEA in HEK-MOCK, HEK-OCT1, HEK-OCT2, HEK-MATE1 and HEK-MATE2-K cells.** (A) HEK-MOCK and HEK-OCT1 cells, (B) HEK-MOCK and HEK-OCT2 cells and (C) HEK-MOCK, HEK-MATE1 and HEK-MATE2-K cells were incubated with 40  $\mu\text{M}$  [ $^{14}\text{C}$ ]-TEA for 5 min at 37°C in the presence or absence of reference transporter inhibitors, *i.e.*, (A) 50  $\mu\text{M}$  verapamil, (B) 500  $\mu\text{M}$  amitriptyline or (C) 200  $\mu\text{M}$  verapamil, at indicated pH values. After washing with ice-cold PBS, intracellular accumulation of TEA was determined by scintillation counting and normalized to total protein content. Data are the means  $\pm$  SEM of at least three independent experiments. \*,  $p < 0.05$  when compared to HEK-MOCK cells (Student's *t*-test); #,  $p < 0.05$  when compared to cells not exposed to reference transporter inhibitor (Student's *t*-test).

(TIF)

**S2 Fig. Effect of Ro 31-8220 on NTCP activity.** HEK-NTCP cells were either untreated or exposed to 2  $\mu\text{M}$  Ro 31-8220 for 1 h. Cells were then incubated with 43.4 nM [ $^3\text{H}$ ]-taurocholate for 5 min at 37°C in the presence or absence of 100  $\mu\text{M}$  cyclosporin A, used here as a reference NTCP inhibitor. After washing with ice-cold PBS, intracellular accumulation of taurocholate was determined by scintillation counting. Data are expressed as % of accumulation of taurocholate in untreated control cells, set at 100%, and are the means  $\pm$  SEM of at least three independent experiments. \*,  $p < 0.05$  when compared with untreated cells (ANOVA followed by Dunnett's post-hoc test).

(TIF)

**S3 Fig. Inhibition of PMA-mediated ERK activation by staurosporine.** HEK-OCT1 cells were untreated, treated with 100 nM PMA or 1  $\mu\text{M}$  staurosporine or co-treated with PMA and staurosporine for 1 h. Phospho-ERK and total ERK protein contents were then determined by Western-blot analysis as described in Materials and Methods. Data shown are representative of two independent experiments.

(TIF)

**S4 Fig. Lack of effect of Ro 31-8220 on OCT1 localization.** HEK-OCT1 cells were either untreated or exposed to 2  $\mu\text{M}$  Ro 31-8220 for 1 h. Cells were next immunolabeled with monoclonal antibodies directed against OCT1 as described in Materials and Methods. Data shown are representative of two independent experiments. OCT1-related membrane staining is indicated by white arrows. Bar = 10  $\mu\text{m}$ .

(TIFF)

**S5 Fig. Linear regression analysis of % of OCT1 activity inhibition for BIMs versus molecular descriptor values.** Linear regression analysis was performed for the % of OCT1 activity inhibition versus values of 3D-WHIM descriptors Au, Am, Av, Ae, Ap, Ai, As, Vu, Vv, Vp and Vi, of the 3D-MoRSE descriptor Mor02s and of the 2D-atom pairs descriptor F10[C-N] for BIMs ( $n = 12$ ). The  $r^2$  value, a measure of the goodness of the fit, and the  $p$ -value are indicated at the top of the graphs.

(TIF)

**S6 Fig. Effects of Ro 31-8220 on kinetic parameters of TEA accumulation in HEK-OCT2 cells.** HEK-OCT2 cells were incubated with increasing concentrations of TEA in the absence or presence of 10  $\mu\text{M}$  Ro 31-8220 for 5 min. TEA uptake velocity ( $v$ ) was next fitted to [TEA] according to the Michaelis-Menten equation, in order to determine  $K_m$  and  $V_{max}$  values (indicated at the top of the graph). Each value shown is the mean  $\pm$  S.E.M. of four independent

experiments. \*,  $p < 0.05$  when compared to cells not exposed to Ro 31-8220 (F-test). (TIF)

## Author Contributions

Conceived and designed the experiments: A. Mayati A. Moreau CD YP OF. Performed the experiments: A. Mayati AB EJ. Analyzed the data: A. Mayati AB OF. Wrote the paper: A. Mayati A. Moreau OF.

## References

1. Davis PD, Elliott LH, Harris W, Hill CH, Hurst SA, Keech E, et al. Inhibitors of protein kinase C. 2. Substituted bisindolylmaleimides with improved potency and selectivity. *J Med Chem.* 1992; 35(6):994–1001. Epub 1992/03/20. PMID: [1552513](#).
2. Davis PD, Hill CH, Keech E, Lawton G, Nixon JS, Sedgwick AD, et al. Potent selective inhibitors of protein kinase C. *FEBS Lett.* 1989; 259(1):61–3. Epub 1989/12/18. PMID: [2532156](#).
3. Camenisch G, Alsenz J, van de Waterbeemd H, Folkers G. Estimation of permeability by passive diffusion through Caco-2 cell monolayers using the drugs' lipophilicity and molecular weight. *Eur J Pharm Sci.* 1998; 6(4):317–24. Epub 1998/10/31. PMID: [9795088](#).
4. Wilkinson SE, Parker PJ, Nixon JS. Isoenzyme specificity of bisindolylmaleimides, selective inhibitors of protein kinase C. *Biochem J.* 1993; 294 (Pt 2):335–7. Epub 1993/09/01. PMID: [8373348](#); PubMed Central PMCID: PMC1134458.
5. Wang Q, Wang X, Zhou Y, Evers BM. PKCdelta-mediated regulation of FLIP expression in human colon cancer cells. *Int J Cancer.* 2006; 118(2):326–34. Epub 2005/07/30. doi: [10.1002/ijc.21373](#) PMID: [16052516](#); PubMed Central PMCID: PMC1850992.
6. Yuan J, Bae D, Cantrell D, Nel AE, Rozengurt E. Protein kinase D is a downstream target of protein kinase Ctheta. *Biochem Biophys Res Commun.* 2002; 291(3):444–52. Epub 2002/02/22. doi: [10.1006/bbrc.2002.6469](#) PMID: [11855809](#).
7. Standaert ML, Galloway L, Karnam P, Bandyopadhyay G, Moscat J, Farese RV. Protein kinase C-zeta as a downstream effector of phosphatidylinositol 3-kinase during insulin stimulation in rat adipocytes. Potential role in glucose transport. *J Biol Chem.* 1997; 272(48):30075–82. Epub 1997/12/31. PMID: [9374484](#).
8. Limatola C, Schaap D, Moolenaar WH, van Blitterswijk WJ. Phosphatidic acid activation of protein kinase C-zeta overexpressed in COS cells: comparison with other protein kinase C isoforms and other acidic lipids. *Biochem J.* 1994; 304 (Pt 3):1001–8. Epub 1994/12/15. PMID: [7818462](#); PubMed Central PMCID: PMC1137431.
9. Mwanjewe J, Spitaler M, Ebner M, Windegger M, Geiger M, Kampfer S, et al. Regulation of phospholipase D isoenzymes by transforming Ras and atypical protein kinase C-iota. *Biochem J.* 2001; 359(Pt 1):211–7. Epub 2001/09/21. PMID: [11563985](#); PubMed Central PMCID: PMC1222137.
10. Numazawa S, Ishikawa M, Yoshida A, Tanaka S, Yoshida T. Atypical protein kinase C mediates activation of NF-E2-related factor 2 in response to oxidative stress. *Am J Physiol Cell Physiol.* 2003; 285(2): C334–42. Epub 2003/04/18. doi: [10.1152/ajpcell.00043.2003](#) PMID: [12700136](#).
11. Cuenda A, Alessi DR. Use of kinase inhibitors to dissect signaling pathways. *Methods Mol Biol.* 2000; 99:161–75. Epub 2000/07/26. doi: [10.1385/1-59259-054-3:161](#) PMID: [10909084](#).
12. Bain J, Plater L, Elliott M, Shpiro N, Hastie CJ, McLauchlan H, et al. The selectivity of protein kinase inhibitors: a further update. *Biochem J.* 2007; 408(3):297–315. Epub 2007/09/14. doi: [10.1042/bj20070797](#) PMID: [17850214](#); PubMed Central PMCID: PMC2267365.
13. Beltman J, McCormick F, Cook SJ. The selective protein kinase C inhibitor, Ro-31-8220, inhibits mitogen-activated protein kinase phosphatase-1 (MKP-1) expression, induces c-Jun expression, and activates Jun N-terminal kinase. *J Biol Chem.* 1996; 271(43):27018–24. Epub 1996/10/25. PMID: [8900190](#).
14. Roberts NA, Haworth RS, Avkiran M. Effects of bisindolylmaleimide PKC inhibitors on p90RSK activity in vitro and in adult ventricular myocytes. *Br J Pharmacol.* 2005; 145(4):477–89. Epub 2005/04/12. doi: [10.1038/sj.bjp.0706210](#) PMID: [15821757](#); PubMed Central PMCID: PMC1576162.
15. Alessi DR. The protein kinase C inhibitors Ro 318220 and GF 109203X are equally potent inhibitors of MAPKAP kinase-1beta (Rsk-2) and p70 S6 kinase. *FEBS Lett.* 1997; 402(2–3):121–3. Epub 1997/02/03. PMID: [9037179](#).

16. Tomas-Zuber M, Mary JL, Lesslauer W. Control sites of ribosomal S6 kinase B and persistent activation through tumor necrosis factor. *J Biol Chem*. 2000; 275(31):23549–58. Epub 2000/05/12. doi: [10.1074/jbc.M002586200](https://doi.org/10.1074/jbc.M002586200) PMID: [10806207](https://pubmed.ncbi.nlm.nih.gov/10806207/).
17. Begemann M, Kashimawo SA, Lunn RM, Delohery T, Choi YJ, Kim S, et al. Growth inhibition induced by Ro 31–8220 and calphostin C in human glioblastoma cell lines is associated with apoptosis and inhibition of CDC2 kinase. *Anticancer Res*. 1998; 18(5A):3139–52. Epub 1998/12/22. PMID: [9858877](https://pubmed.ncbi.nlm.nih.gov/9858877/).
18. Hers I, Tavare JM, Denton RM. The protein kinase C inhibitors bisindolylmaleimide I (GF 109203x) and IX (Ro 31–8220) are potent inhibitors of glycogen synthase kinase-3 activity. *FEBS Lett*. 1999; 460(3):433–6. Epub 1999/11/11. PMID: [10556511](https://pubmed.ncbi.nlm.nih.gov/10556511/).
19. Yeo EJ, Provost JJ, Exton JH. Dissociation of tyrosine phosphorylation and activation of phosphoinositide phospholipase C induced by the protein kinase C inhibitor Ro-31-8220 in Swiss 3T3 cells treated with platelet-derived growth factor. *Biochim Biophys Acta*. 1997; 1356(3):308–20. Epub 1997/05/27. PMID: [9194574](https://pubmed.ncbi.nlm.nih.gov/9194574/).
20. Standaert ML, Bandyopadhyay G, Antwi EK, Farese RV. RO 31–8220 activates c-Jun N-terminal kinase and glycogen synthase in rat adipocytes and L6 myotubes. Comparison to actions of insulin. *Endocrinology*. 1999; 140(5):2145–51. Epub 1999/04/28. doi: [10.1210/endo.140.5.6699](https://doi.org/10.1210/endo.140.5.6699) PMID: [10218965](https://pubmed.ncbi.nlm.nih.gov/10218965/).
21. Han Z, Pantazis P, Lange TS, Wyche JH, Hendrickson EA. The staurosporine analog, Ro-31-8220, induces apoptosis independently of its ability to inhibit protein kinase C. *Cell Death Differ*. 2000; 7(6):521–30. Epub 2000/05/24. doi: [10.1038/sj.cdd.4400681](https://doi.org/10.1038/sj.cdd.4400681) PMID: [10822275](https://pubmed.ncbi.nlm.nih.gov/10822275/).
22. Lingameneni R, Vysotskaya TN, Duch DS, Hemmings HC Jr. Inhibition of voltage-dependent sodium channels by Ro 31–8220, a 'specific' protein kinase C inhibitor. *FEBS Lett*. 2000; 473(2):265–8. Epub 2000/05/17. PMID: [10812087](https://pubmed.ncbi.nlm.nih.gov/10812087/).
23. Gekeler V, Boer R, Ise W, Sanders KH, Schachtele C, Beck J. The specific bisindolylmaleimide PKC-inhibitor GF 109203X efficiently modulates MRP-associated multiple drug resistance. *Biochem Biophys Res Commun*. 1995; 206(1):119–26. Epub 1995/01/05. doi: [10.1006/bbrc.1995.1017](https://doi.org/10.1006/bbrc.1995.1017) PMID: [7818510](https://pubmed.ncbi.nlm.nih.gov/7818510/).
24. Gekeler V, Boer R, Uberall F, Ise W, Schubert C, Utz I, et al. Effects of the selective bisindolylmaleimide protein kinase C inhibitor GF 109203X on P-glycoprotein-mediated multidrug resistance. *Br J Cancer*. 1996; 74(6):897–905. Epub 1996/09/01. PMID: [8826855](https://pubmed.ncbi.nlm.nih.gov/8826855/); PubMed Central PMCID: [PMC2074754](https://pubmed.ncbi.nlm.nih.gov/PMC2074754/).
25. Robey RW, Shukla S, Steadman K, Obrzut T, Finley EM, Ambudkar SV, et al. Inhibition of ABCG2-mediated transport by protein kinase inhibitors with a bisindolylmaleimide or indolocarbazole structure. *Mol Cancer Ther*. 2007; 6(6):1877–85. Epub 2007/06/19. doi: [10.1158/1535-7163.mct-06-0811](https://doi.org/10.1158/1535-7163.mct-06-0811) PMID: [17575116](https://pubmed.ncbi.nlm.nih.gov/17575116/).
26. Nies AT, Koepsell H, Damme K, Schwab M. Organic cation transporters (OCTs, MATEs), in vitro and in vivo evidence for the importance in drug therapy. *Handb Exp Pharmacol*. 2011;(201):105–67. Epub 2010/11/26. doi: [10.1007/978-3-642-14541-4\\_3](https://doi.org/10.1007/978-3-642-14541-4_3) PMID: [21103969](https://pubmed.ncbi.nlm.nih.gov/21103969/).
27. Chen L, Shu Y, Liang X, Chen EC, Yee SW, Zur AA, et al. OCT1 is a high-capacity thiamine transporter that regulates hepatic steatosis and is a target of metformin. *Proc Natl Acad Sci U S A*. 2014; 111(27):9983–8. Epub 2014/06/26. doi: [10.1073/pnas.1314939111](https://doi.org/10.1073/pnas.1314939111) PMID: [24961373](https://pubmed.ncbi.nlm.nih.gov/24961373/); PubMed Central PMCID: [PMC4103324](https://pubmed.ncbi.nlm.nih.gov/PMC4103324/).
28. Jouan E, Le Vee M, Denizot C, Da Violante G, Fardel O. The mitochondrial fluorescent dye rhodamine 123 is a high-affinity substrate for organic cation transporters (OCTs) 1 and 2. *Fundam Clin Pharmacol*. 2014; 28(1):65–77. Epub 2012/08/24. doi: [10.1111/j.1472-8206.2012.01071.x](https://doi.org/10.1111/j.1472-8206.2012.01071.x) PMID: [22913740](https://pubmed.ncbi.nlm.nih.gov/22913740/).
29. Gripon P, Rumin S, Urban S, Le Seyec J, Glaise D, Cannie I, et al. Infection of a human hepatoma cell line by hepatitis B virus. *Proc Natl Acad Sci U S A*. 2002; 99(24):15655–60. Epub 2002/11/15. doi: [10.1073/pnas.232137699](https://doi.org/10.1073/pnas.232137699) PMID: [12432097](https://pubmed.ncbi.nlm.nih.gov/12432097/); PubMed Central PMCID: [PMC137772](https://pubmed.ncbi.nlm.nih.gov/PMC137772/).
30. Le Vee M, Jigorel E, Glaise D, Gripon P, Guguen-Guillouzo C, Fardel O. Functional expression of sinusoidal and canalicular hepatic drug transporters in the differentiated human hepatoma HepaRG cell line. *Eur J Pharm Sci*. 2006; 28(1–2):109–17. Epub 2006/02/21. doi: [10.1016/j.ejps.2006.01.004](https://doi.org/10.1016/j.ejps.2006.01.004) PMID: [16488578](https://pubmed.ncbi.nlm.nih.gov/16488578/).
31. Yasujima T, Ohta K, Inoue K, Yuasa H. Characterization of human OCT1-mediated transport of DAPI as a fluorescent probe substrate. *J Pharm Sci*. 2011; 100(9):4006–12. Epub 2011/03/26. doi: [10.1002/jps.22548](https://doi.org/10.1002/jps.22548) PMID: [21437911](https://pubmed.ncbi.nlm.nih.gov/21437911/).
32. Kotani N, Maeda K, Debori Y, Camus S, Li R, Chesne C, et al. Expression and transport function of drug uptake transporters in differentiated HepaRG cells. *Mol Pharm*. 2012; 9(12):3434–41. Epub 2012/08/18. doi: [10.1021/mp300171p](https://doi.org/10.1021/mp300171p) PMID: [22897388](https://pubmed.ncbi.nlm.nih.gov/22897388/).
33. Le Vee M, Jouan E, Stieger B, Lecureur V, Fardel O. Regulation of human hepatic drug transporter activity and expression by diesel exhaust particle extract. *PLoS One*. 2015; 10(3):e0121232. Epub 2015/03/25. doi: [10.1371/journal.pone.0121232](https://doi.org/10.1371/journal.pone.0121232) PMID: [25803276](https://pubmed.ncbi.nlm.nih.gov/25803276/); PubMed Central PMCID: [PMC4372591](https://pubmed.ncbi.nlm.nih.gov/PMC4372591/).

34. Zhang L, Gorset W, Dresser MJ, Giacomini KM. The interaction of n-tetraalkylammonium compounds with a human organic cation transporter, hOCT1. *J Pharmacol Exp Ther*. 1999; 288(3):1192–8. Epub 1999/02/23. PMID: [10027858](#).
35. Bucher S, Le Vee M, Jouan E, Fardel O. Regulation of hepatic drug transporter activity and expression by organochlorine pesticides. *J Biochem Mol Toxicol*. 2014; 28(3):119–28. Epub 2014/01/28. doi: [10.1002/jbt.21543](#) PMID: [24464585](#).
36. Todeschini R, Vighi M, Finizio A, Gramatica P. 3D-modelling and prediction by WHIM descriptors. Part 8. Toxicity and physico-chemical properties of environmental priority chemicals by 2D-TI and 3D-WHIM descriptors. *SAR QSAR Environ Res*. 1997; 7(1–4):173–93. Epub 1997/01/01. doi: [10.1080/10629369708039130](#) PMID: [9501508](#).
37. Lecreur V, Ferrec EL, N'Diaye M, Vee ML, Gardyn C, Gilot D, et al. ERK-dependent induction of TNF $\alpha$  expression by the environmental contaminant benzo(a)pyrene in primary human macrophages. *FEBS Lett*. 2005; 579(9):1904–10. Epub 2005/03/29. doi: [10.1016/j.febslet.2005.01.081](#) PMID: [15792794](#).
38. Ciarimboli G, Koepsell H, Iordanova M, Gorboulev V, Durner B, Lang D, et al. Individual PKC-phosphorylation sites in organic cation transporter 1 determine substrate selectivity and transport regulation. *J Am Soc Nephrol*. 2005; 16(6):1562–70. Epub 2005/04/15. doi: [10.1681/asn.2004040256](#) PMID: [15829703](#).
39. Pietig G, Mehrens T, Hirsch JR, Cetinkaya I, Piechota H, Schlatter E. Properties and regulation of organic cation transport in freshly isolated human proximal tubules. *J Biol Chem*. 2001; 276(36):33741–6. Epub 2001/07/12. doi: [10.1074/jbc.M104617200](#) PMID: [11447227](#).
40. Ciarimboli G, Struwe K, Arndt P, Gorboulev V, Koepsell H, Schlatter E, et al. Regulation of the human organic cation transporter hOCT1. *J Cell Physiol*. 2004; 201(3):420–8. Epub 2004/09/25. doi: [10.1002/jcp.20081](#) PMID: [15389554](#).
41. Herbert TP, Tee AR, Proud CG. The extracellular signal-regulated kinase pathway regulates the phosphorylation of 4E-BP1 at multiple sites. *J Biol Chem*. 2002; 277(13):11591–6. Epub 2002/01/19. doi: [10.1074/jbc.M110367200](#) PMID: [11799119](#).
42. Stross C, Helmer A, Weissenberger K, Gorg B, Keitel V, Haussinger D, et al. Protein kinase C induces endocytosis of the sodium taurocholate cotransporting polypeptide. *Am J Physiol Gastrointest Liver Physiol*. 2010; 299(2):G320–8. Epub 2010/06/12. doi: [10.1152/ajpgi.00180.2010](#) PMID: [20539008](#).
43. Schonhoff CM, Webster CR, Anwer MS. Tauroolithocholate-induced MRP2 retrieval involves MARCKS phosphorylation by protein kinase C in HUH-NTCP Cells. *Hepatology*. 2013; 58(1):284–92. Epub 2013/02/21. doi: [10.1002/hep.26333](#) PMID: [23424156](#); PubMed Central PMCID: [PMC3681903](#).
44. Nies AT, Koepsell H, Damme K, Schwab M. Organic cation transporters (OCTs, MATEs), in vitro and in vivo evidence for the importance in drug therapy. *Handb Exp Pharmacol*. 2011;(201):105–67. Epub 2010/11/26. doi: [10.1007/978-3-642-14541-4\\_3](#) PMID: [21103969](#).
45. Giacomini KM, Huang SM, Tweedie DJ, Benet LZ, Brouwer KL, Chu X, et al. Membrane transporters in drug development. *Nat Rev Drug Discov*. 2010; 9(3):215–36. Epub 2010/03/02. doi: [10.1038/nrd3028](#) PMID: [20190787](#); PubMed Central PMCID: [PMC3326076](#).
46. Koepsell H. Substrate recognition and translocation by polyspecific organic cation transporters. *Biol Chem*. 2011; 392(1–2):95–101. Epub 2011/01/05. doi: [10.1515/bc.2011.009](#) PMID: [21194363](#).
47. Wittwer MB, Zur AA, Khuri N, Kido Y, Kosaka A, Zhang X, et al. Discovery of potent, selective multidrug and toxin extrusion transporter 1 (MATE1, SLC47A1) inhibitors through prescription drug profiling and computational modeling. *J Med Chem*. 2013; 56(3):781–95. Epub 2012/12/18. doi: [10.1021/jm301302s](#) PMID: [23241029](#); PubMed Central PMCID: [PMC4068829](#).
48. Pedersen JM, Matsson P, Bergstrom CA, Norinder U, Hoogstraate J, Artursson P. Prediction and identification of drug interactions with the human ATP-binding cassette transporter multidrug-resistance associated protein 2 (MRP2; ABCB2). *J Med Chem*. 2008; 51(11):3275–87. Epub 2008/05/07. doi: [10.1021/jm7015683](#) PMID: [18457386](#).
49. Karlgren M, Vildhede A, Norinder U, Wisniewski JR, Kimoto E, Lai Y, et al. Classification of inhibitors of hepatic organic anion transporting polypeptides (OATPs): influence of protein expression on drug-drug interactions. *J Med Chem*. 2012; 55(10):4740–63. Epub 2012/05/01. doi: [10.1021/jm300212s](#) PMID: [22541068](#); PubMed Central PMCID: [PMC3361267](#).
50. Roth M, Araya JJ, Timmermann BN, Hagenbuch B. Isolation of modulators of the liver-specific organic anion-transporting polypeptides (OATPs) 1B1 and 1B3 from *Rollinia emarginata* Schlecht (Annonaceae). *J Pharmacol Exp Ther*. 2011; 339(2):624–32. Epub 2011/08/19. doi: [10.1124/jpet.111.184564](#) PMID: [21846839](#); PubMed Central PMCID: [PMC3199999](#).
51. Zelcer N, Huisman MT, Reid G, Wielinga P, Breedveld P, Kuil A, et al. Evidence for two interacting ligand binding sites in human multidrug resistance protein 2 (ATP binding cassette C2). *J Biol Chem*. 2003; 278(26):23538–44. Epub 2003/04/19. doi: [10.1074/jbc.M303504200](#) PMID: [12702717](#).

52. Ezeamuzie CI, Taslim N. Protein kinase C activation inhibits eosinophil degranulation through stimulation of intracellular cAMP production. *Br J Pharmacol*. 2004; 143(6):725–32. Epub 2004/10/27. doi: [10.1038/sj.bjp.0706028](https://doi.org/10.1038/sj.bjp.0706028) PMID: [15504748](https://pubmed.ncbi.nlm.nih.gov/15504748/); PubMed Central PMCID: [PMC1575935](https://pubmed.ncbi.nlm.nih.gov/PMC1575935/).
53. Loweth JA, Svoboda R, Austin JD, Guillory AM, Vezina P. The PKC inhibitor Ro31-8220 blocks acute amphetamine-induced dopamine overflow in the nucleus accumbens. *Neurosci Lett*. 2009; 455(2):88–92. Epub 2009/04/17. doi: [10.1016/j.neulet.2009.03.012](https://doi.org/10.1016/j.neulet.2009.03.012) PMID: [19368852](https://pubmed.ncbi.nlm.nih.gov/19368852/); PubMed Central PMCID: [PMC2688659](https://pubmed.ncbi.nlm.nih.gov/PMC2688659/).
54. Bayer M, Kuci Z, Schomig E, Grundemann D, Dittmann H, Handgretinger R, et al. Uptake of mIBG and catecholamines in noradrenaline- and organic cation transporter-expressing cells: potential use of corticosterone for a preferred uptake in neuroblastoma- and pheochromocytoma cells. *Nucl Med Biol*. 2009; 36(3):287–94. Epub 2009/03/28. doi: [10.1016/j.nucmedbio.2008.12.010](https://doi.org/10.1016/j.nucmedbio.2008.12.010) PMID: [19324274](https://pubmed.ncbi.nlm.nih.gov/19324274/).
55. Mochly-Rosen D, Das K, Grimes KV. Protein kinase C, an elusive therapeutic target? *Nat Rev Drug Discov*. 2012; 11(12):937–57. Epub 2012/12/01. doi: [10.1038/nrd3871](https://doi.org/10.1038/nrd3871) PMID: [23197040](https://pubmed.ncbi.nlm.nih.gov/23197040/); PubMed Central PMCID: [PMC3760692](https://pubmed.ncbi.nlm.nih.gov/PMC3760692/).
56. Bansal D, Badhan Y, Gudala K, Schifano F. Ruboxistaurin for the treatment of diabetic peripheral neuropathy: a systematic review of randomized clinical trials. *Diabetes Metab J*. 2013; 37(5):375–84. Epub 2013/11/08. doi: [10.4093/dmj.2013.37.5.375](https://doi.org/10.4093/dmj.2013.37.5.375) PMID: [24199167](https://pubmed.ncbi.nlm.nih.gov/24199167/); PubMed Central PMCID: [PMC3816139](https://pubmed.ncbi.nlm.nih.gov/PMC3816139/).
57. Galvez MI. Rubosixtaurin and other PKC inhibitors in diabetic retinopathy and macular edema. Review. *Curr Diabetes Rev*. 2009; 5(1):14–7. Epub 2009/02/10. PMID: [19199893](https://pubmed.ncbi.nlm.nih.gov/19199893/).
58. Bosco R, Melloni E, Celegghini C, Rimondi E, Vaccarezza M, Zauli G. Fine tuning of protein kinase C (PKC) isoforms in cancer: shortening the distance from the laboratory to the bedside. *Mini Rev Med Chem*. 2011; 11(3):185–99. Epub 2011/05/04. PMID: [21534929](https://pubmed.ncbi.nlm.nih.gov/21534929/).
